# Supplementary material for: Fabrication of oxygen-releasing dextran microgels by droplet-based microfluidic method
Source: Royal Society of Chemistry journal article supplement (doi:10.1039/d4ra04356a), 2024-01-01
Supplement: d4ra04356a1.pdf [file d4ra04356a1.pdf]

Supporting Information

**Fabrication of oxygen-releasing dextran microgels by droplet-based microfluidic method**

Daisuke Tomioka, <sup>†a</sup> Shannon Anna Jung, <sup>†b,c</sup> Andrij Pich\*<sup>b,c</sup> and Michiya Matsusaki\*<sup>a</sup>

<sup>a</sup>Department of Applied Chemistry, Graduate School of Engineering, Osaka University, 2-1 Yamadaoka, Suita, Osaka, 565-0871, Japan.

E-mail: m-matsus@chem.eng.osaka-u.ac.jp

<sup>b</sup>DWI-Leibniz Institute for Interactive Materials, RWTH Aachen University, Forckenbeckstraße 50, 52074 Aachen, Germany

<sup>c</sup>Institute for Technical and Macromolecular Chemistry, RWTH Aachen University, Worringerweg 2, 52074 Aachen, Germany

**Table of contents**

Fig. S1 Pictures of microfluidic synthesis

Fig. S2 <sup>1</sup>H-NMR of dextran and Dex-MA

Fig. S3 FT-IR spectra of dextran and Dex-MA

Fig. S4 Elemental analysis on microgel to evaluate the leakage of CP nanoparticles

Fig. S5 Cytocompatibility test of oxygen releasing microgels

Fig. S6 SEM-EDX measurement of microgels

Fig. S7 XRD measurement of microgels

Fig. S8 Oxygen release behavior of ACC-CP microgel over time

Fig. S9 Oxygen release behavior of microgels for the comparison

Fig. S10 Stability of ACC-CP microgel

Fig. S11 Oxygen release behavior of ACC-CP and CP nanoparticles

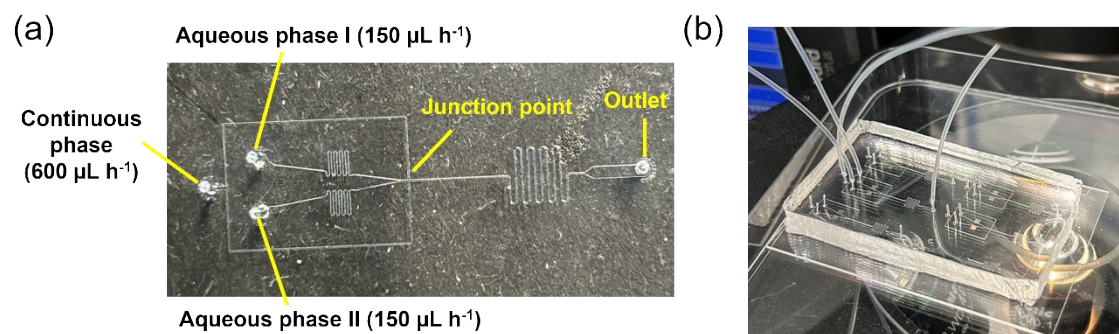

**Fig. S1** Pictures of (a) microfluidic device and (b) microgel fabrication process.

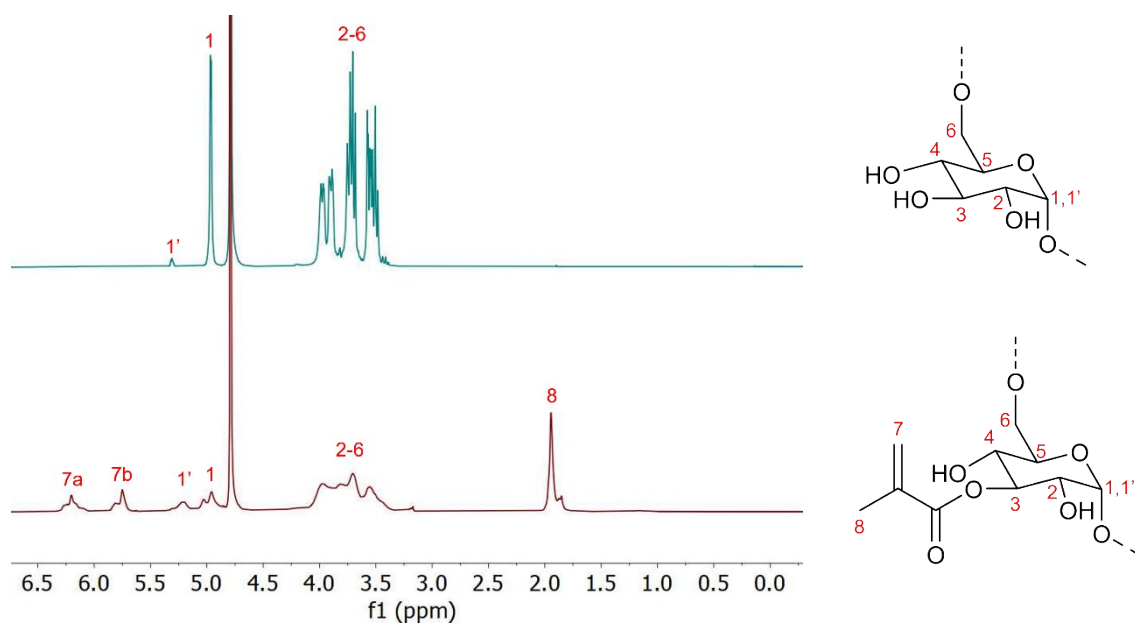

**Fig. S2** <sup>1</sup>H-NMR of dextran (top) and Dex-MA (bottom) in D<sub>2</sub>O.

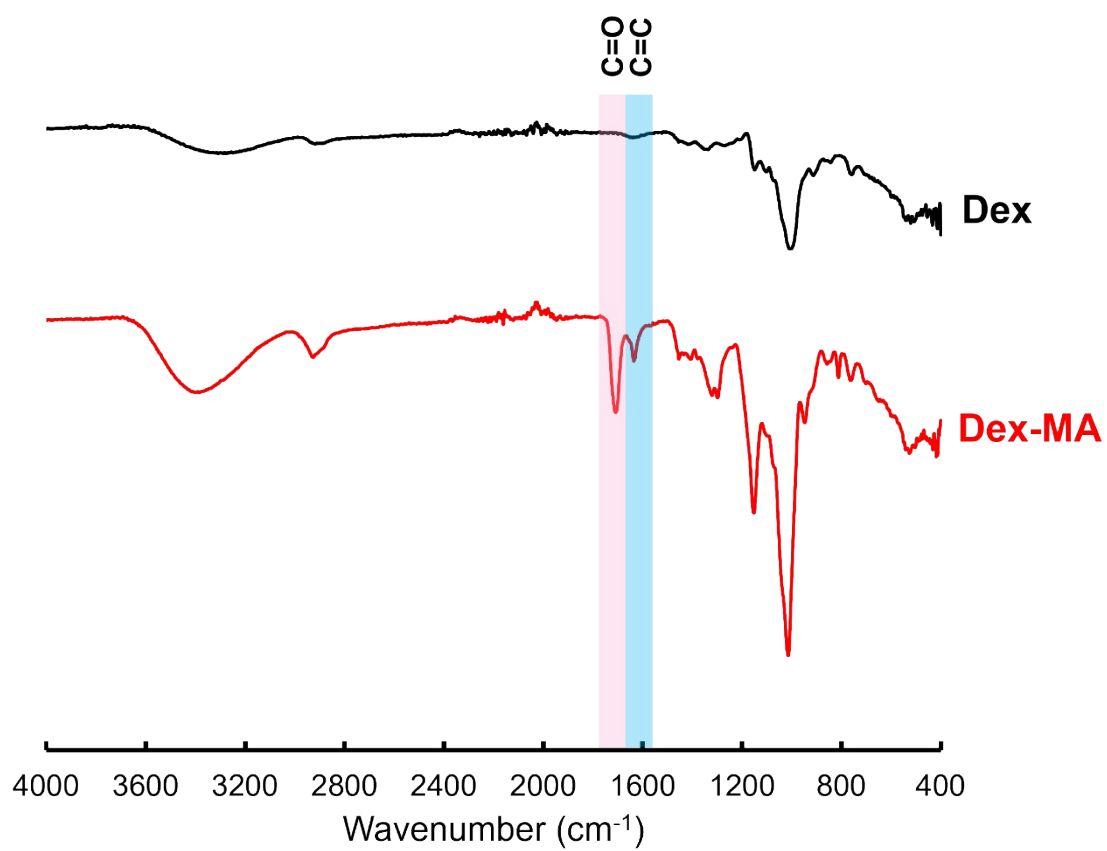

**Fig. S3** FT-IR spectra of dextran and Dex-MA.

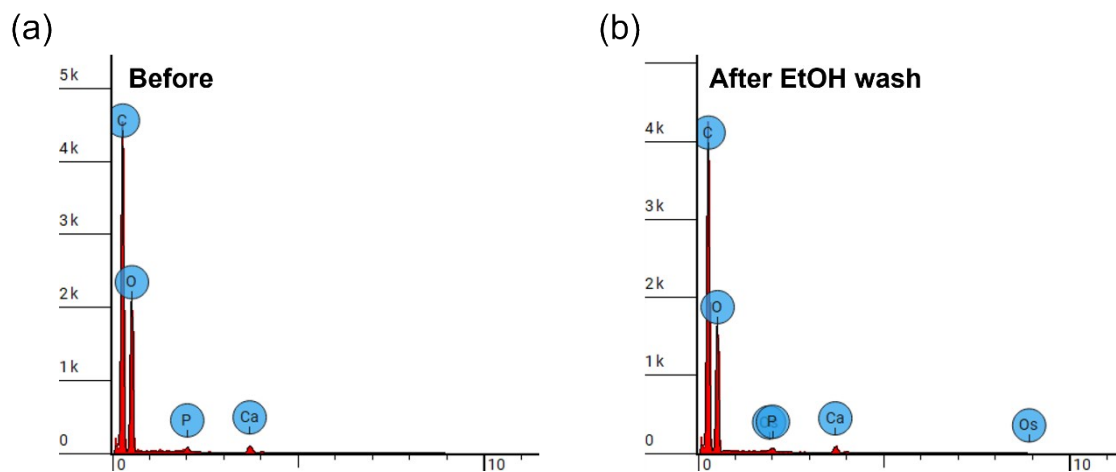

**Fig. S4** EDX spectra of microgel containing  $10 \text{ mg mL}^{-1}$  CP nanoparticles (a) before and (b) after dispersing in ethanol for three times.

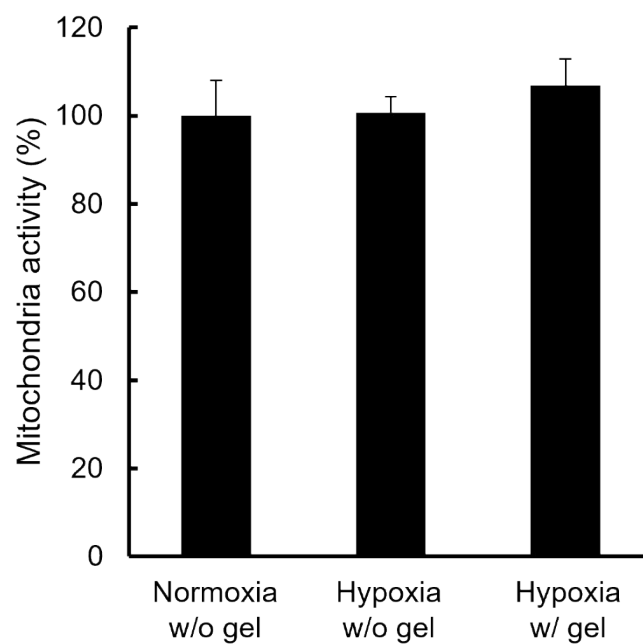

**Fig. S5** Mitochondrial activities of NHDF after 1 day incubation with and without microgels containing  $10 \text{ mg mL}^{-1}$  CP nanoparticles in the presence of  $1000 \text{ U mL}^{-1}$  catalase under a hypoxic condition. Mitochondrial activity of each sample was standardized from the relative values as compared to 100 % for that of a cell culture under normoxic condition. All data are representative of four independent experiments, mean  $\pm$  SD.

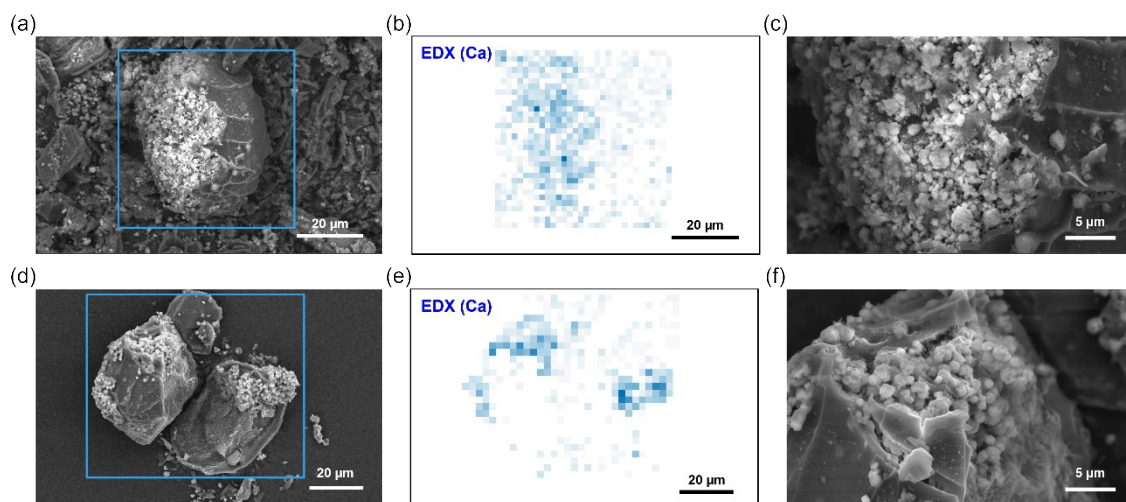

**Fig. S6** (a) SEM image, (b) elemental mapping of calcium at the blue square area in (a) by EDX and (c) high magnification SEM image of the cross section at the crashed microgels containing 10 mg mL<sup>-1</sup> CP nanoparticles. (d) SEM image, (e) elemental mapping of calcium at the blue square area in (d) by EDX and (f) high magnification SEM image of the cross section at the crashed ACC-CP microgels.

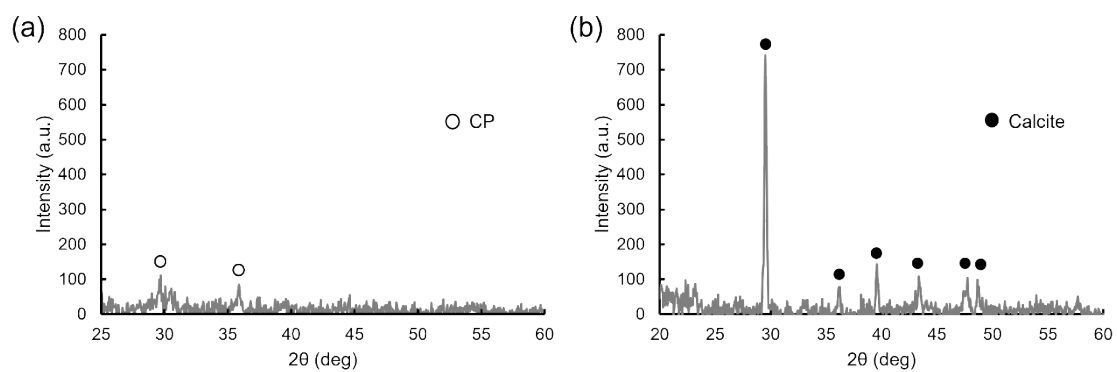

**Fig. S7** XRD spectra of (a) microgel containing 10 mg mL<sup>-1</sup> CP nanoparticles and (b) ACC-CP microgel.



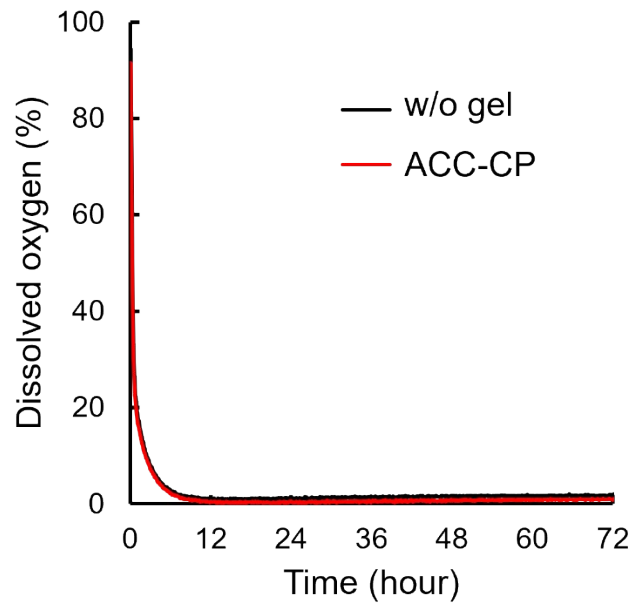

**Fig. S8** Dissolved oxygen concentration changes in 500  $\mu\text{L}$  DMEM containing 100  $\text{U mL}^{-1}$  catalase and 15  $\text{mg mL}^{-1}$  Dex-MA microgel encapsulating ACC-CP under a hypoxic condition for 72 hours.

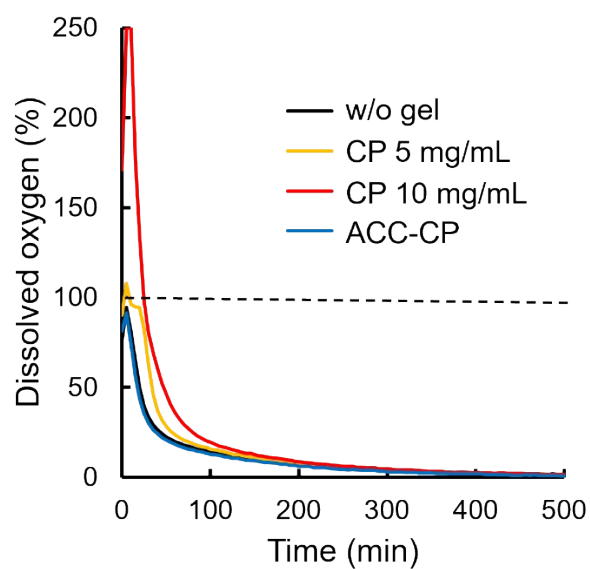

**Fig. S9** Dissolved oxygen concentration changes in 500  $\mu\text{L}$  DMEM containing 100  $\text{U mL}^{-1}$  catalase and 15  $\text{mg mL}^{-1}$  Dex-MA microgel encapsulating 5 and 10  $\text{mg mL}^{-1}$  CP nanoparticles and ACC-CP under a hypoxic condition for the comparison.

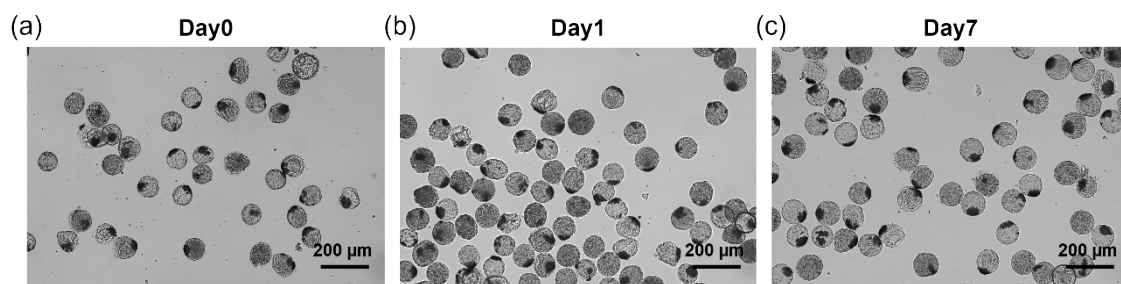

**Fig. S10** Bright field images of a freeze-dried ACC-CP microgel (a) soon after the dispersion in DMEM model solution (44 mM  $\text{NaHCO}_3$  solution containing  $0.1 \text{ mg mL}^{-1} \text{ NaH}_2\text{PO}_4$ ) and (b) 1 day and (c) 7 days incubation in DMEM model solution at room temperature.

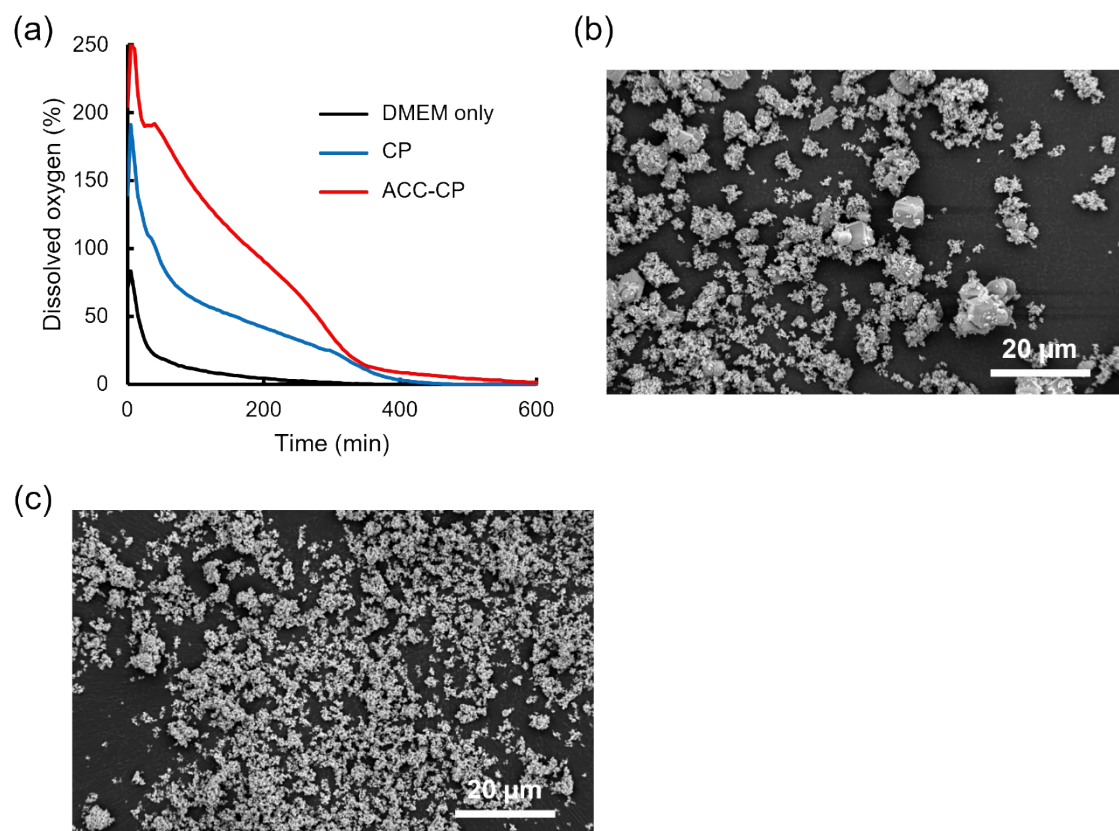

**Fig. S11** (a) Dissolved oxygen concentration changes in 500  $\mu\text{L}$  DMEM containing 100  $\text{U mL}^{-1}$  catalase and 1  $\text{mg mL}^{-1}$  CP nanoparticles and ACC-CP under a hypoxic condition. ACC-CP was fabricated by immersing 0.5  $\text{mg}$  CP nanoparticles in 50  $\mu\text{L}$  of 44  $\text{mM}$   $\text{NaHCO}_3$  including 0.1  $\text{mg mL}^{-1}$   $\text{NaH}_2\text{PO}_4$  for 1 hour. SEM images of (b) prepared ACC-CP and (c) CP nanoparticles immersed in DMEM for 1 hour at a concentration of 1  $\text{mg mL}^{-1}$ .
